# Supplementary material
Source: PubMed Central journal article supplement (PMC3071287)

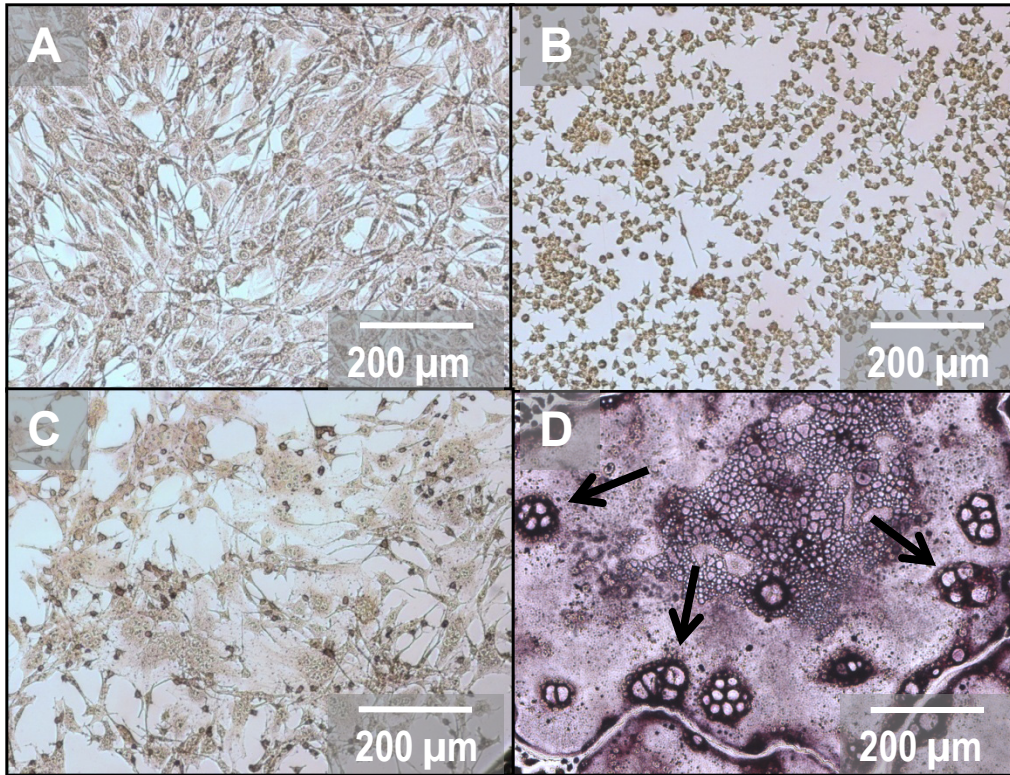

Supplement: NIHMS281939-supplement-01.pdf [file NIHMS281939-supplement-01.pdf]

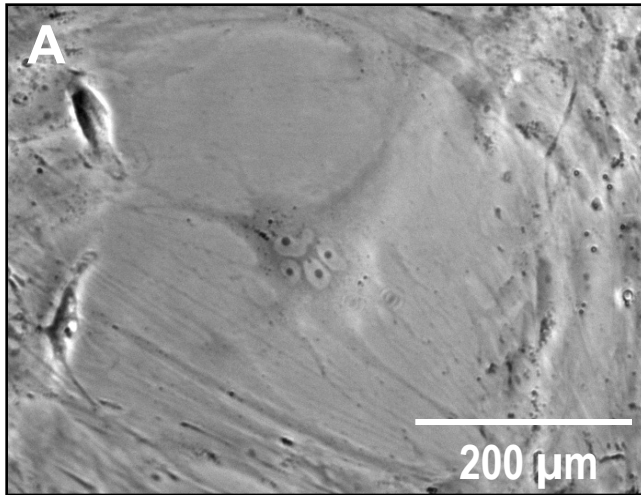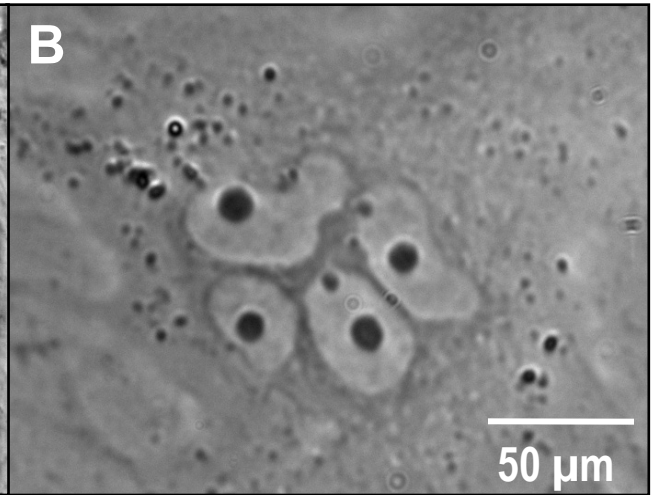

Supplement: NIHMS281939-supplement-02.pdf [file NIHMS281939-supplement-02.pdf]

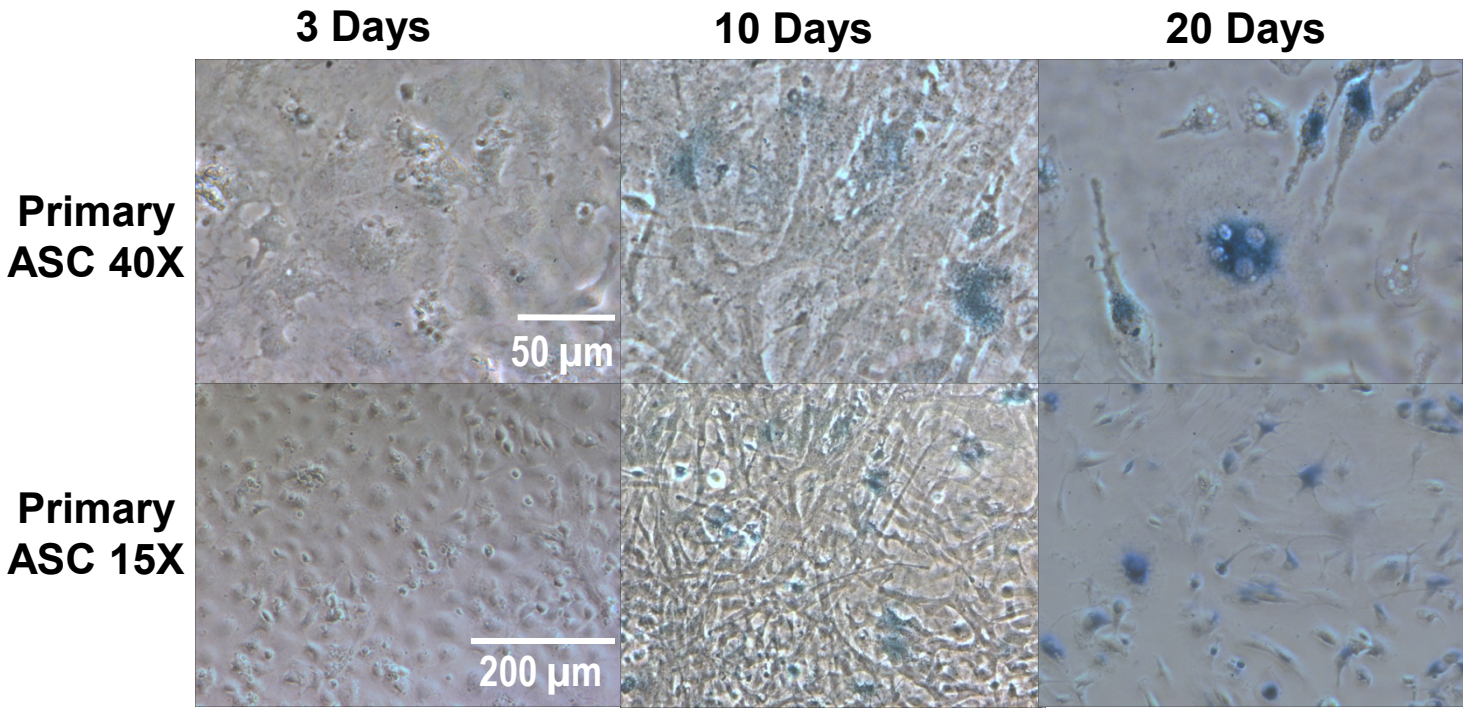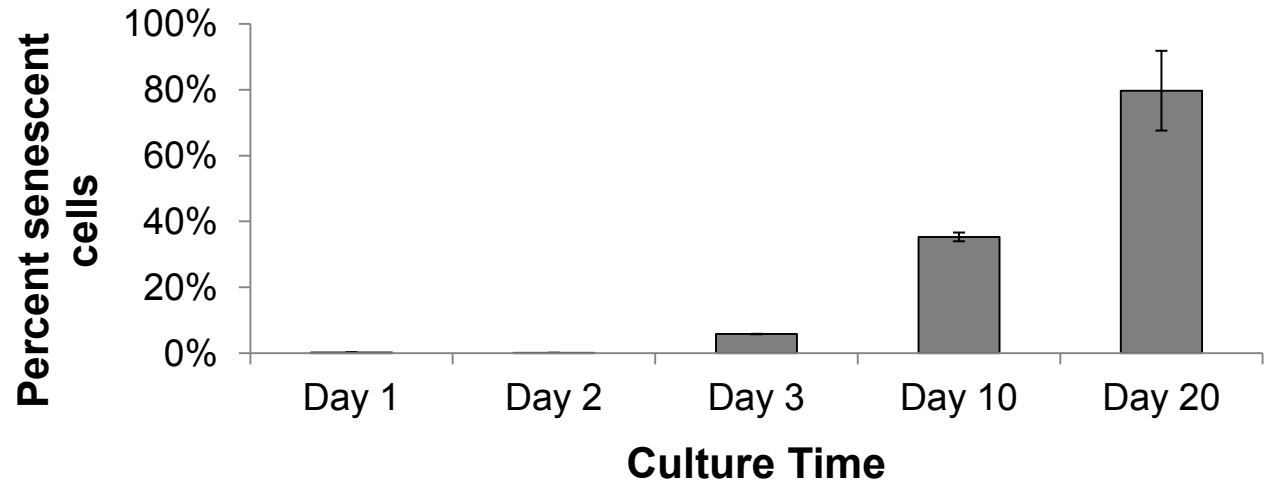

Supplement: NIHMS281939-supplement-03.pdf [file NIHMS281939-supplement-03.pdf]

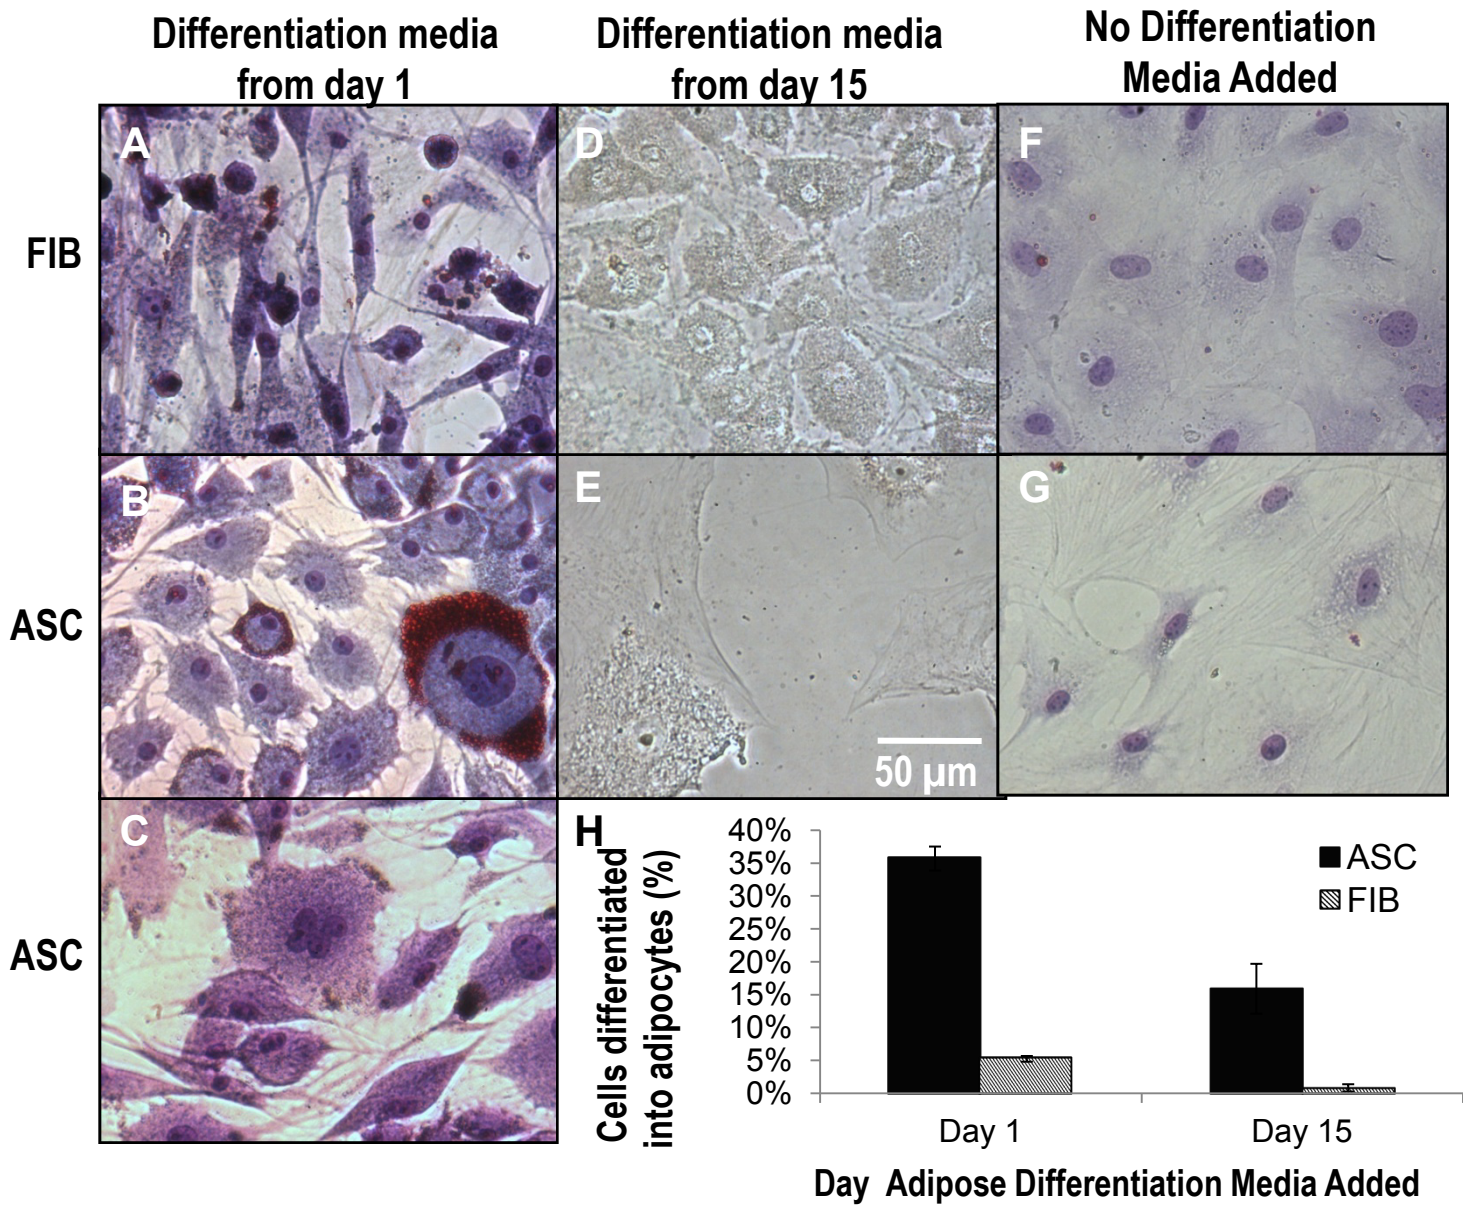

Supplement: NIHMS281939-supplement-04.pdf [file NIHMS281939-supplement-04.pdf]
